# Supplementary material
Source: PubMed Central journal article supplement (PMC5563682)
Supplement: 12264_2015_1556_MOESM1_ESM.pdf [file 12264_2015_1556_MOESM1_ESM.pdf]

## SUPPLEMENTARY MATERIAL

**Statistics for Figure 1:** 0.15 pmol of GluA<sub>2-3y</sub> (Randall Selitto test:  $F_{\text{left/left}} = 13.84$ ,  $P < 0.001$ ,  $F_{\text{right/right}} = 10.86$ ,  $P < 0.001$ ; hot-plate test:  $F_{\text{left/left}} = 23.30$ ,  $P < 0.001$ ,  $F_{\text{right/right}} = 22.88$ ,  $P < 0.001$ ), 1.5 pmol GluA<sub>2-3y</sub> (Randall Selitto test:  $F_{\text{left/left}} = 61.62$ ,  $P < 0.001$ ,  $F_{\text{right/right}} = 100.50$ ,  $P < 0.001$ ; hot-plate test:  $F_{\text{left/left}} = 118.90$ ,  $P < 0.001$ ,  $F_{\text{right/right}} = 206.00$ ,  $P < 0.001$ ), 7.5 pmol GluA<sub>2-3y</sub> (Randall Selitto test:  $F_{\text{left/left}} = 29.19$ ,  $P < 0.001$ ,  $F_{\text{right/right}} = 14.43$ ,  $P < 0.001$ ; hot-plate test:  $F_{\text{left/left}} = 52.46$ ,  $P < 0.001$ ,  $F_{\text{right/right}} = 123.6$ ,  $P < 0.001$ ), and 15 pmol GluA<sub>2-3y</sub> (Randall Selitto test:  $F_{\text{left/left}} = 135.00$ ,  $P < 0.001$ ,  $F_{\text{right/right}} = 94.71$ ,  $P < 0.001$ ; hot-plate test:  $F_{\text{left/left}} = 134.90$ ,  $P < 0.001$ ,  $F_{\text{right/right}} = 330.60$ ,  $P < 0.001$ ) compared with the control group

**Statistics for Figure 3:** 0.15 pmol GluA<sub>2-3y</sub> (Randall Selitto test:  $F_{\text{left/left}} = 31.77$ ,  $P < 0.001$ ,  $F_{\text{right/right}} = 2.77$ ,  $P = 0.12$ ; hot-plate test:  $F_{\text{left/left}} = 40.21$ ,  $P < 0.001$ ,  $F_{\text{right/right}} = 4.90$ ,  $P < 0.05$ ), 1.5 pmol GluA<sub>2-3y</sub> (Randall Selitto test:  $F_{\text{left/left}} = 75.45$ ,  $P < 0.001$ ,  $F_{\text{right/right}} = 8.01$ ,  $P < 0.05$ ; hot-plate test:  $F_{\text{left/left}} = 220.10$ ,  $P < 0.001$ ,  $F_{\text{right/right}} = 93.56$ ,  $P < 0.001$ ), 7.5 pmol GluA<sub>2-3y</sub> (Randall Selitto test:  $F_{\text{left/left}} = 149.40$ ,  $P < 0.001$ ,  $F_{\text{right/right}} = 31.93$ ,  $P < 0.001$ ; hot-plate test:  $F_{\text{left/left}} = 237.80$ ,  $P < 0.001$ ,  $F_{\text{right/right}} = 248.70$ ,  $P < 0.001$ ), and 15 pmol GluA<sub>2-3y</sub> (Randall Selitto test:  $F_{\text{left/left}} = 146.10$ ,  $P < 0.001$ ,  $F_{\text{right/right}} = 8.35$ ,  $P < 0.05$ ; hot-plate test:  $F_{\text{left/left}} = 61.84$ ,  $P < 0.001$ ,  $F_{\text{right/right}} = 133.50$ ,  $P < 0.001$ ) compared with the control group.
